# Supplementary material for: Plasma Krebs Cycle Intermediates in Nonalcoholic Fatty Liver Disease
Source: PubMed Central journal article supplement (PMC7073566; doi:10.3390/jcm9020314), 2020-01-22

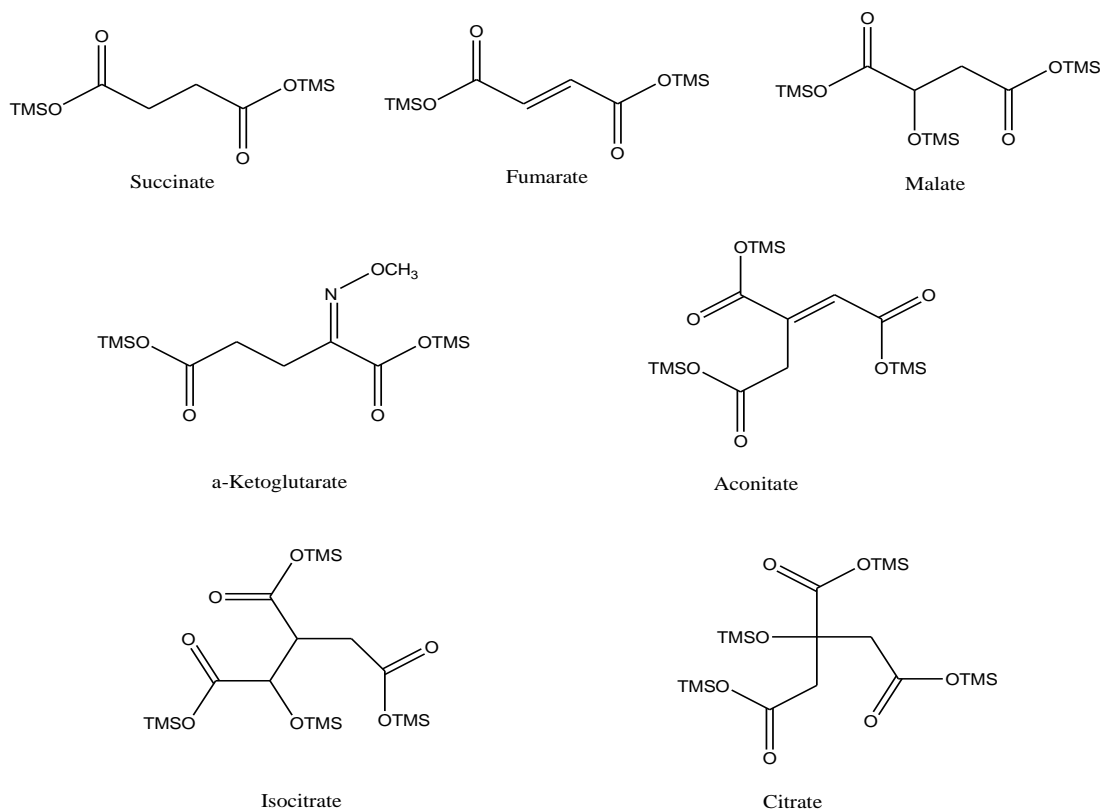

Supplemental Figure 1: Post derivatization structures of citric acid cycle metabolites under the study. TMS- Trimethylsilyl

| Analyte/Internal standard                                 | RT        | Target ions    |
|-----------------------------------------------------------|-----------|----------------|
| Succinate/ Succinate $d_6^*$                              | 7.22      | $m/z$ 247; 251 |
| Fumarate/ Fumarate $^{13}C_4$                             | 7.53      | $m/z$ 245; 249 |
| Malate/ Malate $^{13}C_4$                                 | 8.8       | $m/z$ 233; 236 |
| $\alpha$ -Ketoglutarate/ $\alpha$ - Ketoglutarate $d_6^*$ | 9.5       | $m/z$ 304; 308 |
| Citrate/ Citrate $^{13}C_6$                               | 11.4      | $m/z$ 273; 278 |
| Aconitate/Tricarballic acid                               | 10.8/10.7 | $m/z$ 229; 377 |
| Isocitrate/Tricarballic acid                              | 11.4/10.7 | $m/z$ 245; 377 |

\*Deuterium labeling on acidic positions is lost during derivatization process.

Supplemental Table 1: Target ions and retention times for all analytes and internal standards

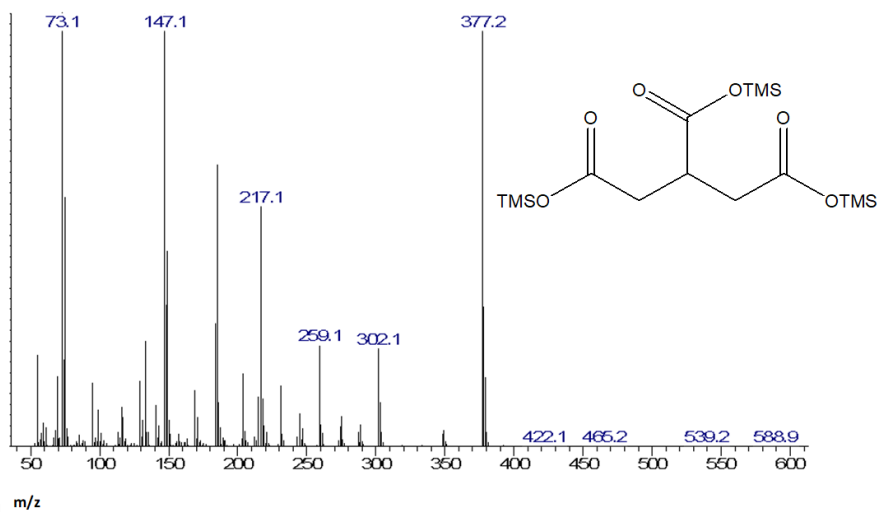

Supplemental figure 2: Tricarballic acid EI-MS spectrum

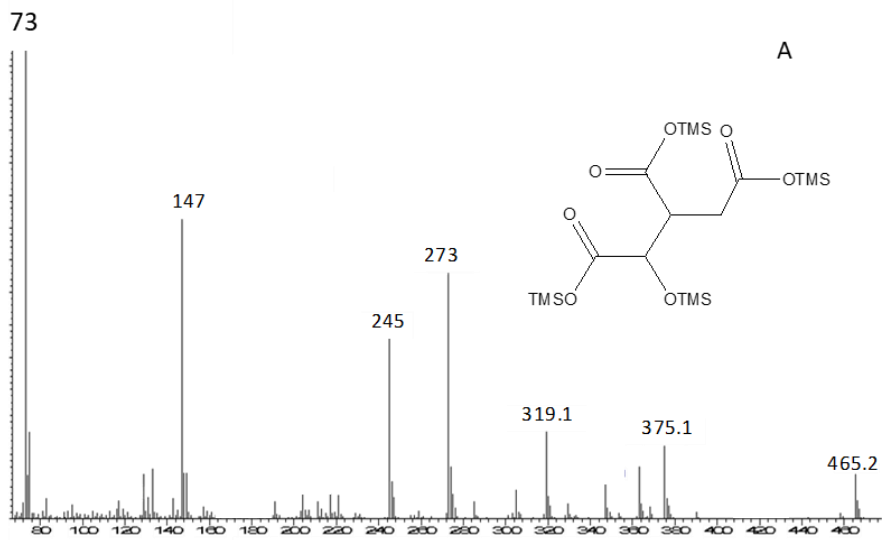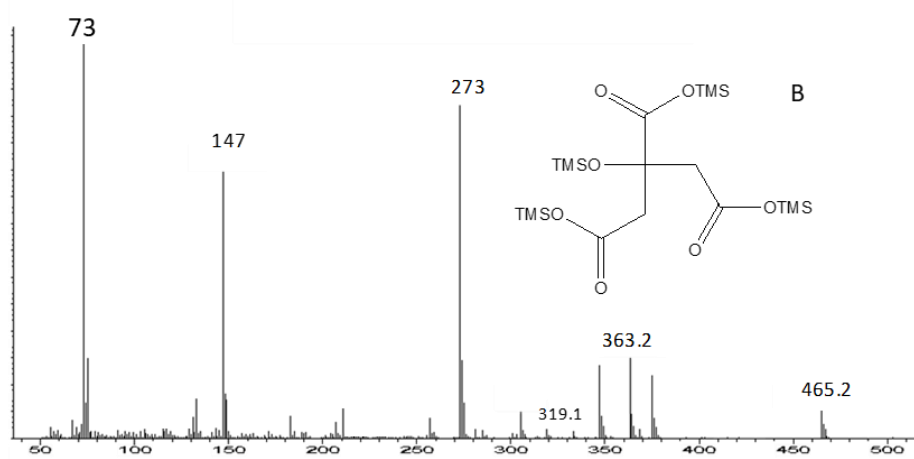

Supplemental figure 3: (A) isocitrate and (B) citrate EI-MS spectra.  $m/z$  245 is specific to isocitrate

Supplemental Figure 4: Calculated HSI. NAFLD (n=22) and control (n=67). Statistical analysis performed by Prism 8 (GraphPad). \* p<0.05

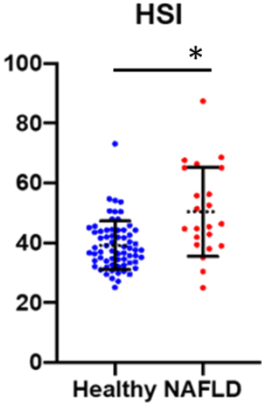

Supplement: jcm-09-00314-s001.pdf [file jcm-09-00314-s001.pdf]
